1 Self-reported Health is Related to Body Height and Waist Circumference in  
2 Rural Indigenous and Urbanised Latin-American Populations

3  
4 Juan David Leongómez<sup>1\*</sup>, Oscar R. Sánchez<sup>1</sup>, Milena Vásquez-Amézquita<sup>2</sup>, Eugenio Valderrama<sup>1,#a</sup>,  
5 Andrés Castellanos-Chacón<sup>1</sup>, Lina Morales-Sánchez<sup>1,#b</sup>, Javier Nieto<sup>3</sup>, Isaac González-Santoyo<sup>4\*</sup>

6  
7 <sup>1</sup>Human Behaviour Lab, Faculty of Psychology, Universidad El Bosque. Bogota, Colombia.

8 <sup>2</sup>Experimental Psychology Lab, Faculty of Psychology, Universidad El Bosque, Bogota, Colombia.

9 <sup>3</sup>Laboratory of Learning and Adaptation, Faculty of Psychology, National Autonomous University of  
10 Mexico, Mexico City, Mexico.

11 <sup>4</sup>Neuroecology Lab, Faculty of Psychology, National Autonomous University of Mexico, Mexico City,  
12 Mexico.

13 <sup>#a</sup>Current Address: LH Bailey Hortorium, Plant Biology Section, School of Integrative Plant Science,  
14 Cornell University, Ithaca, NY, United States of America.

15 <sup>#b</sup>Current Address: Department of Psychology, Faculty of Social Sciences, Los Andes University,  
16 Bogota, Colombia.

17

18 \*Corresponding authors

19 E-mail address: [jleongomez@unbosque.edu.co](mailto:jleongomez@unbosque.edu.co) (JDL), [isantoyo.unam@gmail.com](mailto:isantoyo.unam@gmail.com) (IG-S)

20

## 21 **Abstract**

22 Body height is a life-history component. It involves important costs for its expression and maintenance,  
23 which may originate trade-offs on other costly components such as reproduction or immunity. Although  
24 previous evidence has supported the idea that human height could be a sexually selected trait, the  
25 explanatory mechanisms that underlie this selection are poorly understood. Despite extensive studies on  
26 the association between height and attractiveness, the role of immunity in linking this relation is scarcely  
27 studied, particularly in non-Western populations. Here, we tested whether human height is related to  
28 health measured by self-perception, and relevant nutritional and health anthropometric indicators in  
29 three Latin-American populations that widely differ in socioeconomic and ecological conditions: two  
30 urbanised populations from Bogota (Colombia) and Mexico City (Mexico), and one isolated indigenous  
31 population (Me'Phaa, Mexico). Results of linear mixed models showed that self-rated health is best  
32 predicted by an interaction between height and waist circumference, and the costs associated with large  
33 waist circumference are height-dependent, affecting taller people more than shorter individuals. If  
34 health and genetic quality cues play an important role in human mate-choice, and height and waist  
35 interact to signal health, its evolutionary consequences, including cognitive and behavioural effects,  
36 should be addressed in future research.

37 **Keywords:** Self-reported health, body height, waist circumference, Linear Mixed Models, Latin-  
38 American populations, honest signals

39

## 40 **Introduction**

41 In modern Western societies, it has been seen that women usually prefer men who are  
42 significantly taller than average [1–3], while men are more tolerant in choosing women who are taller or  
43 shorter than average [4]. This is consistent with the idea that male height can be adaptive [5] and sexual  
44 selection favours taller men, possibly because height may represent a honest signal of individual quality,  
45 providing hereditary advantages, such as genetic quality for the offspring [6,7], or direct benefits,  
46 provisioning resources and protection for women and their children [8]. Following these last possible  
47 benefits, height has been also proposed as an indicator of resource holding potential (RHP), in terms of  
48 social dominance and deference [9,10] and socioeconomic status [6,11].

49 This idea is supported by evidence that the male height is directly correlated with reproductive  
50 success, which is not applicable to women, suggesting an unrestricted directional selection that favours  
51 very tall men but not to very tall women [12]. In fact, it has been reported that taller men (but not  
52 extremely tall men) are more likely to find a long-term partner and have several different long-term  
53 partners [13], while the maximum reproductive success of women is below the female average height  
54 [14]. Furthermore, heterosexual men and women tend to adjust their preferred height of hypothetical  
55 partners according to their own stature [15]. In general, heterosexual men and women prefer couples in  
56 which the man is taller than the woman, and women show a preference for facial cues that denote a taller  
57 man [16].

58 Although previous evidence has supported the idea that human height could be a sexually  
59 selected trait, the explanatory mechanisms underlying this selection are poorly understood.

60 One possibility can be addressed in the framework of the life-history theory [17], and the  
61 immunocompetence handicap hypothesis (ICHH) [18–20]. Growth in body height is a life-history

62 component [1,21], that involves important costs for its expression and maintenance, which may originate  
63 trade-offs on other costly components such as reproduction [22] or immunity [23].

64 The costs in height can be measured in terms of survival and physiological expenditure [23]. For  
65 example, it has been shown that shorter people are more likely to be more longevous and less likely to  
66 suffer from age-related chronic diseases [23,24]. According to the Hayflick limit theory of ageing [25],  
67 our cells have a limited number of cell replications available in a lifetime. A minimal increment in body  
68 height involves more cells, maybe trillions, and large numbers of cell replications. These large numbers  
69 of cell replications demand a large pool of proteins to maintain taller, larger bodies [23], which together,  
70 with an increase of free radicals generated by normal cellular metabolism, may lead to a greater  
71 likelihood of DNA damage [26], thus increasing the incidence of cancer and reducing longevity [23].

72 Trade-offs between these life-history components could be mediated by sex hormones. The  
73 trade-off with reproduction occurs because sex steroids reallocate energetic and physiological resources  
74 to reproduction at the beginning of sexual maturity instead of somatic growth. For instance, increased  
75 oestrogen production leads to the onset of menstrual bleeding in women, but slows the process of  
76 growth, hence causing it to cease [27]. In addition, oestrogen stimulates mineral deposition in the growth  
77 plates at the ends of the long bones, thus terminating cell proliferation and resulting in the fusion of the  
78 growth plates to the shaft of the bone [28,29]. In turn, increased sex steroids trigger a trade-off with  
79 immunity, which usually exerts suppressive effects on several immune components [18]. For example,  
80 testosterone may increase the severity of malaria, leishmaniasis, amoebiasis [30] and perhaps  
81 tuberculosis [31,32].

82 Therefore, as a consequence of these life-history trade-offs, height could be considered as a  
83 reliable indicator of an individual's condition in terms of (1) the amount and quality of nutritional  
84 resources acquired until sexual maturity, (2) the RHP to obtain resources for the somatic maintenance in

85 the adult stage, and (3) the current immunocompetence to afford the immune cost imposed by sexual  
86 steroids. Thus, in accordance with ICHH, height can be used for potential partners to receive  
87 information about the quality of potential mate; only high-quality individuals could afford to allocate  
88 resources to better immunity and attractive secondary sexual traits simultaneously [19], which would  
89 result in an increased sexual preference towards taller individuals.

90 Despite extensive studies on the association between height and attractiveness, the role of  
91 immunity in linking this relation is poorly studied. Moreover, most studies have been done using high-  
92 income developed populations such as Western, Educated, Industrialised, Rich and Democratic  
93 (WEIRD) societies [33], which has led to a lack of information of what is occurring in other populations  
94 with important socio-ecological differences. These ecological pressures are important because although  
95 genetic allelic expression could be the main factor that determines individual height differences [27],  
96 height is also the most sensible human anatomical feature that responds to environmental and  
97 socioeconomic conditions [22,34]. For instance, variation in height across social classes is known to be  
98 greater in poorer countries [35] but is much reduced in countries with higher standards of living [36].  
99 Economic inequality not only affects the population's nutritional patterns, which are especially  
100 important during childhood to establish adult height, but also the presence of infectious diseases [37].  
101 Childhood disease is known to adversely affect growth. For instance, mounting an immune response to  
102 fight against the infection requires concomitant increases in metabolic rate, which could affect the net  
103 nutrition, and hence reduces productivity. Disease also prevents food intake, impairs nutrient absorption  
104 and causes nutrient loss [38,39]. Therefore, compared with high-income and developed populations,  
105 habitants from sites with stronger ecological pressures imposed by pathogens or greater nutritional  
106 deficiencies would face greater costs to robustly express this trait, thereby showing stronger sexual  
107 selective pressure over height, as it signals signal growth rates, life-history trajectories and health status

108 more accurately. This phenotypic variation is described as developmental plasticity, which is a part of  
109 the phenotypic plasticity related to growth and development, in response to social, nutritional and  
110 demographic conditions, among others [40]. During the last century, given a general improvement in  
111 nutrition, human height has steadily increased across the globe [41], but the level of dimorphism in  
112 favour of men is maintained.

113 Colombia and Mexico are two of the most socioeconomically heterogeneous countries in the  
114 world with a high Human Development Index [42]. Colombia and Mexico attain respective scores of 68  
115 and 66 in the Healthcare Access and Quality Index [43], indicating that the populations are in relatively  
116 good health compared to global standards. Also, Colombia and Mexico have GINI coefficients of 50.8  
117 and 43.4, respectively, making them the 12<sup>th</sup> and 43<sup>rd</sup> most unequal countries in the world (GINI index –  
118 World Bank estimate; <https://data.worldbank.org/indicator/SI.POV.GINI>). These national-level  
119 statistics, however, hide important within-country differences. In particular, Latin-American people in  
120 rural areas tend to be poorer and have less access to basic services such as health and education than  
121 people in urban areas.

122 According to data from the World Bank and the Colombian National Administrative Department  
123 of Statistics, in 2017 Colombia was the second most unequal country in Latin-America after Brazil. In  
124 rural areas, 36% of people were living in poverty and 15.4% in extreme poverty, while in urban areas,  
125 these values were only 15.7% and 2.7%, respectively [for a summary, see 44].

126 In addition to rural communities, in Latin-America indigenous people tend to have high rates of  
127 poverty and extreme poverty [45], and poorer health [46], which is less susceptible to improve by the  
128 national income growth [47]. In Mexico, there are at least 56 independent indigenous peoples whose  
129 lifestyle practices differ in varying degrees from the typical ‘urbanised’ lifestyle. Among these groups,  
130 the Me’Phaa people, from an isolated region known as ‘*Montaña Alta*’ of the state of Guerrero, is one of

131 the groups whose lifestyle most dramatically differs from the typical Westernised lifestyle of more  
132 urbanised areas [48]. Me'Phaa communities are small groups of indigenous people, composed of 50 to  
133 80 families, each with five to ten family members. Most communities are based largely on subsistence  
134 farming of legumes such as beans and lentils, and the only grain cultivated is corn. Animal protein is  
135 acquired by hunting and raising some fowls, and meat is only consumed during special occasions but not  
136 part of the daily diet. There is almost no access to allopathic medications, and there is no health service,  
137 plumbing or water purification system. Water for washing and drinking is obtained from small wells.  
138 Most of the Me'Phaa speak only their native language [49]. In consequence, these communities have the  
139 lowest income and economic development in the country, and the highest child morbidity and mortality  
140 due to chronic infectious diseases [48].

141 These three Latin-American populations can provide an interesting indication about how the  
142 regional socioeconomic conditions and intensity of ecological pressures by pathogens may modulate the  
143 function of height as an informative sexually selected trait of health and individual condition. Therefore,  
144 the aim of the present study was to evaluate whether human height is related to health measured by self-  
145 perception, and relevant nutritional and health anthropometric indicators in three Latin-American  
146 populations that widely differ in socioeconomic and ecological conditions: two urbanised populations  
147 from Bogota (Colombia) and Mexico City (Mexico), and one isolated indigenous population (Me'Phaa,  
148 Mexico).

## 149 **Materials and Methods**

### 150 **Participants**

151 A total of 477 adults (238 women and 239 men) participated in this study. They were from three  
152 different samples: (1) Mexican indigenous population, (2) Mexican urban population and (3) Colombian  
153 urban population. In Mexico, Me'Phaa indigenous participants from 'La *Montaña Alta*' were recruited  
154 and participated in this study between January and March 2017, while data from participants from  
155 Mexico City was collected between May and June 2017. In Colombia, data collection was carried out  
156 between October and December 2018.

157 The first sample consisted of 63 subjects (mean age  $\pm$  standard deviation [SD] =  $33.63 \pm 9.69$   
158 years old) from the small Me'Phaa community – '*Plan de Gatica*' from a region known as '*Montaña*  
159 *Alta*' of the state of Guerrero in Southwest Mexico. In this sample, 24 participants were women ( $33.46 \pm$   
160  $8.61$  years old) and 39 participants were men ( $33.74 \pm 10.41$  years old), who participated in a larger  
161 study on immunocompetence. Both sexes were aged above 18 years old. In Mexico, people above 18  
162 years old are considered adults. All measurements were collected in the participants' own community.  
163 Me'Phaa communities are about 20 km apart, and it takes about three hours of travel on rural dirt roads  
164 to reach the nearest large town, about 80 km away. Mexico City is about 850 km away, and the trip  
165 takes about twelve hours by road. This community has the lowest income in Mexico, the highest index  
166 of child morbidity and mortality by gastrointestinal and respiratory diseases (children aged 0 to 8 years  
167 had the highest vulnerability and death risk [48]), and the lowest access to health services. These  
168 conditions were recorded in the National Health Information System 2016 [48].

169 The second sample consisted of 60 subjects of over 18 years old ( $30.27 \pm 8.56$  years old) from  
170 the general community in Mexico City, of whom 30 were women ( $37.47 \pm 5.61$  years old) and 30 were  
171 men ( $23.07 \pm 3.22$  years old). Finally, the third sample consisted of 354 undergraduate students with  
172 ages ranging from 18 to 30 years old ( $20.39 \pm 2.10$  years old), 184 were women ( $20.16 \pm 2.08$  years



173 old), and 170 were men ( $20.64 \pm 2.10$  years old) from Bogota, Colombia. All urban participants were  
174 recruited through public advertisements.

175 Participants from both urban population samples were taking part in two separate, larger studies  
176 in each country. In Colombia, all data were collected in the morning, between 7 and 11 am, because  
177 saliva samples (for hormonal analysis), as well as voice recordings, body odour samples, and facial  
178 photographs were also collected as part of a separate project. Additionally, women in the Colombian and  
179 Mexican samples were not hormonal contraception users, and all data were collected within the first  
180 three days of their menses.

181 Participants who were under allopathic treatment and hormonal contraception users from both  
182 countries were excluded from data collection. All participants completed a sociodemographic data  
183 questionnaire, which included medical and psychiatric history. No women were users of hormonal  
184 contraception. Although no participant reported any endocrinological or chronic disease, these health  
185 issues were also considered as exclusion criteria.

186 Given that the indigenous community of '*Plan de Gatica*' consists of 60–80 families, each with  
187 five to seven members, the final sample for this study could be considered as semi-representative of a  
188 larger Me'Phaa population inhabiting in the same community. Nevertheless, the total population of  
189 Me'Phaa people inhabiting the '*Montaña Alta*' is comprised of 20–30 communities with almost the  
190 same number of families as '*Plan de Gatica*'. Therefore, it is important to mention that our sample size  
191 cannot be considered representative of the total Me'Phaa people inhabiting the '*Montaña Alta*' region,  
192 but from the specific '*Plan de Gatica*' community. Similar condition occurs for participants from the  
193 Mexico City and Bogota samples. These participants were recruited at the National Autonomous  
194 University of México and Universidad El Bosque campuses, respectively. Therefore, these samples are  
195 comprised mostly of bachelor and graduate students, and cannot be considered as representative of a

196 large population of the whole city, which is comprised of about 12 million adult persons in Mexico and  
197 about 5 million adults in Bogota.

## 198 **Procedure**

199 All participants signed the informed consent and completed the health and background  
200 questionnaires. For participants from the indigenous population, the whole procedure was carried out  
201 within their own communities, and participants from the Mexican and Colombian urban population  
202 attended a laboratory at either the National Autonomous University of México or Universidad El Bosque  
203 respectively, on individual appointments.

204 Participants from Mexico City and Bogota were recruited through public advertisements on  
205 social media and poster boards located along the central campus of the National Autonomous University  
206 and Universidad El Bosque. While in Mexico City, participants received either one partial course credit  
207 or a payment equivalent to \$5 dollars as compensation for their participation, all participants in Bogota  
208 were given academic credits for their participation.

209 For the indigenous groups, recruitment was done through the Xuajin Me'Phaa non-governmental  
210 organisation, which is dedicated to the social, environmental and economic development for the  
211 indigenous communities of the region (see video from this organisation, [http://youtu.be/In4b9\\_Ek78o](http://youtu.be/In4b9_Ek78o)).  
212 Xuajin Me'Phaa has extensive experience in community-based fieldwork and has built a close working  
213 relationship with the community authorities. The trust and familiarity with the community customs and  
214 protocols have previously led to successful academic collaborations [48, 49]. Therefore, Xuajin  
215 Me'Phaa served as a liaison between the Mexican research group the and communities for the present  
216 study, offering mainly two important factors in data collection: the informed consent of community  
217 members and participants, and two trained interpreters of Me'Phaa and Spanish language of both sexes.

218 First, participants were asked to complete the health and sociodemographic data questionnaires.  
219 Subsequently, the anthropometric measurements were taken.

## 220 **Self-reported health**

221 In order to obtain a standardised value of self-perception of health, we implemented in all three  
222 populations the Short Form (36) health survey (SF-36; RAND Corp.). The SF-36 produces eight  
223 dimensions, calculated by averaging the recoded scores of individual items: (1) Physical functioning  
224 (items 3 to 12), (2) Role limitations due to physical health (items 13 to 16), (3) Role limitations due to  
225 emotional problems (items 17 to 19), (4) Energy/fatigue (items 23, 27, 29 and 31), (5) Emotional well-  
226 being (items 24, 25, 26, 28 and 30), (6) Social functioning (items 20 and 32), (7) Pain (items 21 and 22)  
227 and (8) General health (items 1, 33, 34, 35 and 36).

228 The interpreters provided by the Xuajin Me'Phaa organisation administered the SF-36 Health  
229 survey in Me'Phaa language. Interpreters used Spanish as the second language and are thoroughly  
230 proficient in speaking and reading Spanish. We used the validated SF-36 survey for urban and rural  
231 Mexican populations [52] for interpreters to translate Spanish to Me'Phaa language. Given the ethnical  
232 customs of Me'Phaa culture, the participants were always interviewed by an interpreter of the same sex  
233 to avoid bias in participant responses; for instance, men were interviewed by a male interpreter and  
234 women by a female interpreter. The same interpreter interviewed all participants of his/her  
235 corresponding sex.

236 For the present study, both urban and indigenous participants only answered items corresponding  
237 to the dimension defined as general health (i.e. Item numbers 1, 33, 34, 35 and 36), except for item 35.  
238 This item informs about the expectation for future health. Since the grammatical compositions of

239 Me'Phaa language do not consider 'infinitive' and 'future' as verbal tenses [53], an interpretation of this  
240 question was not possible for the Me'Phaa people, therefore, this item was excluded.

241 In Colombia, we used a Spanish version of the SF-36 questionnaire [54], that was previously  
242 validated in the same country[55].

243 To obtain the self-reported health rate, all items were recoded following the instructions on how  
244 to score SF-36 [54]. We calculated the final factor by averaging the recoded items. To make this data  
245 compatible with the Mexican database, item 35 was excluded because it cannot be answered by the  
246 Mexican Indigenous population, and the general health dimension was calculated by averaging only  
247 items 1, 33, 34 and 36.

## 248 **Anthropometric measurements**

249 All anthropometric measurements were measured thrice and subsequently averaged to obtain the  
250 mean value (for agreement statistics between the three measurements of each characteristic, see section  
251 1.3 in the Supplementary Material). All participants wore light clothing and had their shoes removed.  
252 The same observer repeated the measurements thrice.

253 We measured the body height in cm, to the nearest mm, by using a 220 cm Zaude stadiometer,  
254 with the participant's head aligned according to the Frankfurt horizontal plane, and feet together against  
255 the wall.

256 Anthropomorphic measurements also included waist circumference (cm), weight (kg), fat  
257 percentage, visceral fat level, muscle percentage and body mass index (BMI). The waist circumference  
258 was measured midway between the lowest rib and the iliac crest in cm by using a flexible tape and was  
259 recorded to the nearest mm. These anthropomorphic measurements have been used as an accurate index  
260 of nutritional status and health, especially waist circumference. Metabolic syndrome is associated with

261 visceral adiposity, blood lipid disorders, inflammation, insulin resistance or full-blown diabetes and  
262 increased risk of developing cardiovascular disease [54,55, for a review, see 56], including Latin-  
263 American populations [59]. Waist circumference has been proposed as a crude anthropometric correlate  
264 of abdominal and visceral adiposity, and it is the simplest and accurate screening variable used to  
265 identify people with the features of metabolic syndrome [60,61]. Hence, in the presence of the clinical  
266 criteria of metabolic syndrome, increased waist circumference provides relevant pathophysiological  
267 information insofar as it defines the prevalent form of the syndrome resulting from abdominal obesity  
268 [57].

269 Weight, fat percentage, visceral fat level, muscle percentage and BMI were obtained using an  
270 Omron Healthcare HBF-510 body composition analyser, which was calibrated before each participant's  
271 measurements were obtained.

## 272 **Statistical analysis**

273 We used linear mixed models (LMM) to test the association between height and health. The  
274 dependent variable in this model was the self-reported health factor and predictor variables included  
275 participant sex, age, population (indigenous or urban), height and waist and anthropometric  
276 measurements (hip, weight, fat percentage, BMI and muscle percentage) as fixed, main effects.  
277 Interactions between height and population, height and sex and height and waist circumference were  
278 also included. The country was always included as a random factor, with random intercepts.

279 Although allowing slopes to vary randomly is recommended [62], we only included random  
280 intercepts in the models because there was only one data-point per subject. Population (indigenous or  
281 urban) was always included as a fixed effect because while there are important differences in health (and  
282 self-reported health) between indigenous and urban populations in Latin-America, no such differences

283 were expected by country. LMM were fitted to test the residual distribution. In all cases, residuals were  
284 closer to a normal or gamma (inverse link) distribution, for each population/country. Models were fitted  
285 using the *lmer* function from the *lmerTest* package [63;  
286 <https://www.rdocumentation.org/packages/lmerTest>] in R, version 3.5.2 [64].

287 The most parameterised initial model was then reduced based on the Akaike Information  
288 Criterion (AIC) and the best-supported model (i.e. the model with the lowest AIC with a  $\Delta$ AIC higher  
289 than two units from the second most adequate model) is reported [see 65]. To accomplish this, we  
290 implemented the *ICtab* function from the *bbmle* package [66;  
291 <http://www.rdocumentation.org/packages/bbmle>]. Once a final model was selected, model diagnostics  
292 were performed (collinearity, residual distribution and linearity of residuals in each single term effect;  
293 see section 3 in the Supplementary Material).

## 294 **Results**

295 All data and code used to perform these analyses are openly available from the Open Science  
296 Framework (OSF) project for this study (<https://osf.io/5rzfs/>).

297 Figure 1 shows the distribution of age, waist, hip, height, weight, fat percentage, visceral fat,  
298 BMI, muscle percentage and self-reported health. Age, waist, height, visceral fat and self-reported  
299 health, strongly varied in both women (Fig 1A) and men (Fig 1B) between samples from each  
300 population (indigenous or urban) and country (Colombia, Mexico).

301

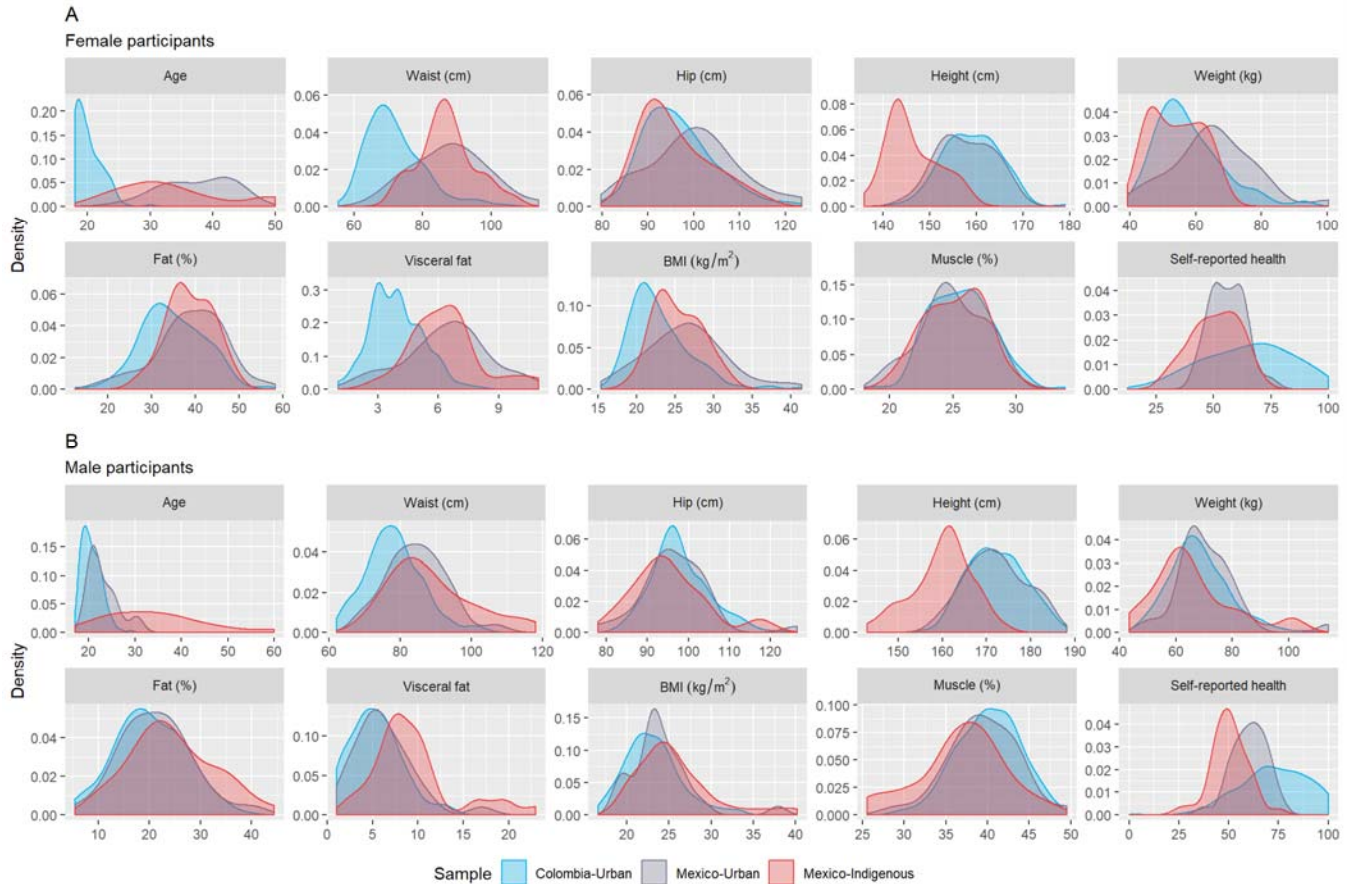

302

303 **Figure 1. Distribution of all measured variables by sex, population and country.** (A) Male participants. (B) Male  
 304 participants. For descriptives (mean, SD, median, minimum and maximum values), see Table S2 (female participants) and  
 305 Table S3 (male participants) in the Supplementary Material.

306

307 To establish the relationship between height and self-reported health, we fitted three mixed  
 308 models (Table 1).

309

310 **Table 1. Results of separate LMMs testing effects of independent variables on self-reported health.**

|                          | Model 1  |           |          | Model 2  |           |          | Model 3  |           |          |
|--------------------------|----------|-----------|----------|----------|-----------|----------|----------|-----------|----------|
|                          | Estimate | <i>df</i> | <i>p</i> | Estimate | <i>df</i> | <i>p</i> | Estimate | <i>df</i> | <i>p</i> |
| (Intercept)              | -47.33   | 458.96    | 0.723    | -205.97  | 466       | 0.057    | -223.02  | 466.91    | 0.036    |
| Age                      | 0.13     | 424.47    | 0.444    | 0.15     | 382.15    | 0.37     | .        | .         | .        |
| BMI (kg/m <sup>2</sup> ) | 1.2      | 458.03    | 0.501    | .        | .         | .        | .        | .         | .        |

|                        |        |        |       |       |        |              |       |        |              |
|------------------------|--------|--------|-------|-------|--------|--------------|-------|--------|--------------|
| Fat (%)                | -0.19  | 458    | 0.653 | .     | .      | .            | .     | .      | .            |
| Height (cm)            | 0.73   | 458.79 | 0.392 | 1.7   | 465.54 | 0.011        | 1.82  | 466.04 | <b>0.005</b> |
| Height:PopulationUrban | 0.59   | 458.03 | 0.05  | .     | .      | .            | .     | .      | .            |
| Height:SexMale         | -0.25  | 458.23 | 0.258 | .     | .      | .            | .     | .      | .            |
| Height:Waist           | -0.01  | 458.62 | 0.479 | -0.02 | 465.54 | 0.02         | -0.02 | 466.09 | <b>0.01</b>  |
| Hip (cm)               | -0.28  | 458.08 | 0.219 | .     | .      | .            | .     | .      | .            |
| Muscle (%)             | 0.12   | 458.95 | 0.81  | .     | .      | .            | .     | .      | .            |
| PopulationUrban        | -83.95 | 458    | 0.073 | 7.85  | 438.81 | <b>0.021</b> | 7.65  | 376.41 | <b>0.023</b> |
| SexMale                | 40.82  | 458.54 | 0.267 | 6     | 465.02 | <b>0.008</b> | 5.87  | 466.04 | <b>0.01</b>  |
| Waist (cm)             | 1.33   | 458.32 | 0.493 | 2.94  | 465.38 | 0.034        | 3.23  | 466.29 | 0.017        |
| Weight (kg)            | -0.32  | 458.09 | 0.622 | .     | .      | .            | .     | .      | .            |

311  
 312 *Note.* The indigenous population and females were used as reference for categorical predictors. Significant effects are in bold.  
 313 For a full version of this table, including standard errors and *t*-values, see Table S7, and for an ANOVA-like table of random  
 314 effects, see Table S8 in The Supplementary Material available online.  
 315

316 In the first model, we included as predictors all measured variables as main effects, as well as the  
 317 interactions between height and population, height and sex, and height and waist. In the second model,  
 318 we included age, height, population, sex, waist, and the interaction between height and waist. For the  
 319 final, third model, we removed age since this predictor did not have any influence on the self-reported  
 320 health factor in the previous models.

321 These three models were compared using the AIC, Akaike weights ( $w_i$  AIC) and  $\Delta$ AIC (Table 2).  
 322 The analyses revealed that Model 3 is not only the most parsimonious model, but has a lower AIC and  
 323 higher Akaike weight [see 65] than the previous two models. In fact, Model 3 is 4.56 times more likely  
 324 to be the best model compared with Model 2, and more than 400 times compared with Model 1 (in  
 325 comparison with Model 1, Model 2 is close to 90 times more likely to be the best model).  
 326

327 **Table 2. Performance criteria of LME models.**

| Model   | AIC      | $\Delta$ AIC | <i>df</i> | $w_i$ (AIC) |
|---------|----------|--------------|-----------|-------------|
| Model 3 | 4006.985 | .            | 8         | 0.8185      |
| Model 2 | 4010.019 | 3.0342       | 9         | 0.1795      |
| Model 1 | 4019.03  | 12.0447      | 16        | 0.002       |



328 *Note.* Models are in descending order from the best to the worst fitting.  $\Delta$ AIC is the change in AIC between each model and  
329 the previous model. Akaike weights  $w_i(\text{AIC})$  are conditional probabilities for each model being the best model [65].  
330

331 Nevertheless, for Model 3 (the minimum adequate model), Variance Inflation Factors (VIF)  
332 revealed extreme collinearity for height, waist, and the interaction between height and waist ( $\text{VIF} > 68$   
333 in those cases; Table S9). This problem, however, was solved after centring and rescaling both height  
334 and waist measures ( $\text{VIF} < 2.4$  in all cases; Table S10). In addition, this centred and rescaled version of  
335 Model 3 had no issues regarding its residual distribution (i.e. for all samples it resembled a normal  
336 distribution) and linearity of residuals (see Fig S2); each single term predictor was linearly related to  
337 self-rated health (see Fig S3).

338 Furthermore, the final, centred and rescaled version of Model 3 had a lower AIC than model 3  
339 (3988 vs. 4007) and was over 10000 times more likely to be the best model, as revealed by Akaike  
340 weights (see Table S11).

341 The final model (Table 3; Fig 2) showed a significant, negative main effect of waist  
342 circumference ( $t = -3.23$ ,  $\beta = -2.93$ ,  $p = 0.001$ ), a significant effect of population (urban samples rated  
343 their health 7.65 points higher than indigenous participants;  $t = 2.28$ ,  $p = 0.02$ ) and sex (men rated their  
344 health 5.87 points higher than women  $t = 2.60$ ,  $p = 0.010$ ). In addition, this model (Table 3) revealed that  
345 Colombians reported better health than Mexicans (Fig 2B).

346

347 **Table 3. Results of the final LMM testing effects of independent variables on self-reported health**

|                    | <b>Estimate</b> | <b>SE</b> | <b>df</b> | <b>t</b> | <b>p</b>     |
|--------------------|-----------------|-----------|-----------|----------|--------------|
| (Intercept)        | 53.74           | 5.02      | 2.66      | 10.7     | <b>0.003</b> |
| Height_cs          | 1.53            | 1.2       | 466.25    | 1.27     | 0.204        |
| Waist_cs           | -2.93           | 0.91      | 432.99    | -3.23    | <b>0.001</b> |
| SexMale            | 5.87            | 2.26      | 466.04    | 2.6      | <b>0.01</b>  |
| PopulationUrban    | 7.65            | 3.36      | 376.41    | 2.28     | <b>0.023</b> |
| Height_cs:Waist_cs | -2.2            | 0.85      | 466.09    | -2.6     | <b>0.01</b>  |

348 *Note.* The indigenous population and females were used as reference for categorical predictors. Significant effects are in bold.  
349 Both waist and height were centred and rescaled (identified by the suffix *\_cs*).  
350

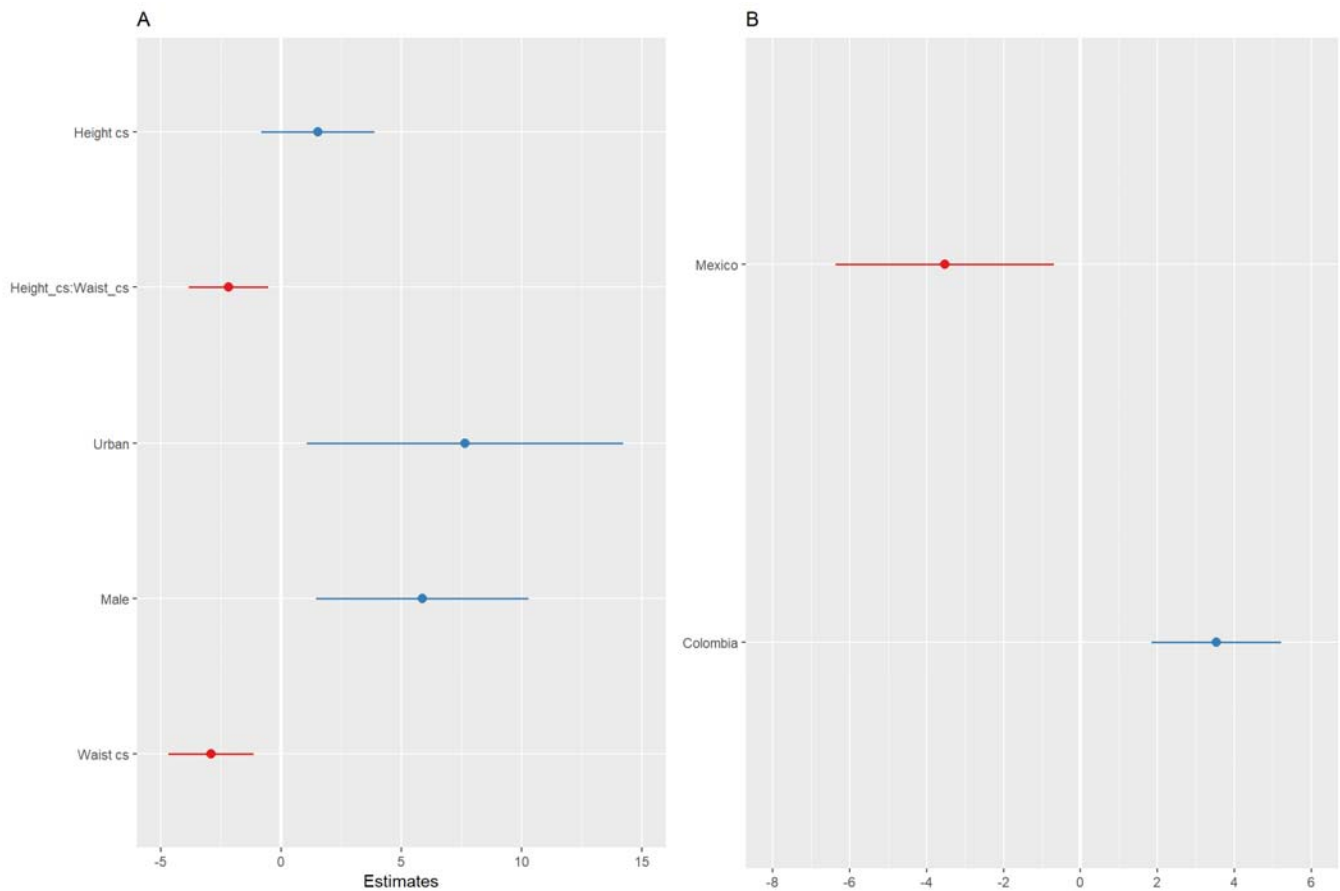

351  
352 **Figure 2. Final model estimates.** Forest-plot of estimates for each fixed factor with 95% confidence interval [CI]. (A) Fixed  
353 effects. (B) Random effects. For categorical fixed predictors, indigenous population and female participants were used as  
354 reference. Both waist and height were centred and rescaled (identified by the suffix *\_cs*).  
355

356 Moreover, a significant interaction between waist and height (Table 3;  $t = -2.06$ ,  $p = 0.041$ ) was  
357 exposed, indicating that the associated health costs of a larger waist circumference were height-  
358 dependent (Fig 3); the best predicted self-rated health was for tall participants with small waists, and the  
359 worst was for (again) tall participants but with large waist circumferences. The model also revealed that  
360 for shorter people, there are no predicted significant associated costs of having a large waist. In other

361 words, the association between height and self-rated health is positive for people with small waist  
362 circumferences, but negative for people with large waists.

363 In addition, age, waist circumference, height, fat percentage, visceral fat, BMI and muscle  
364 percentage, were significantly correlated with self-rated health ( $r > 0.10$ , in all cases) in men and women  
365 (bivariate Pearson correlations between all measured variables in all participants are shown in the Table  
366 S4, women in Table S5 and men in Table S6).

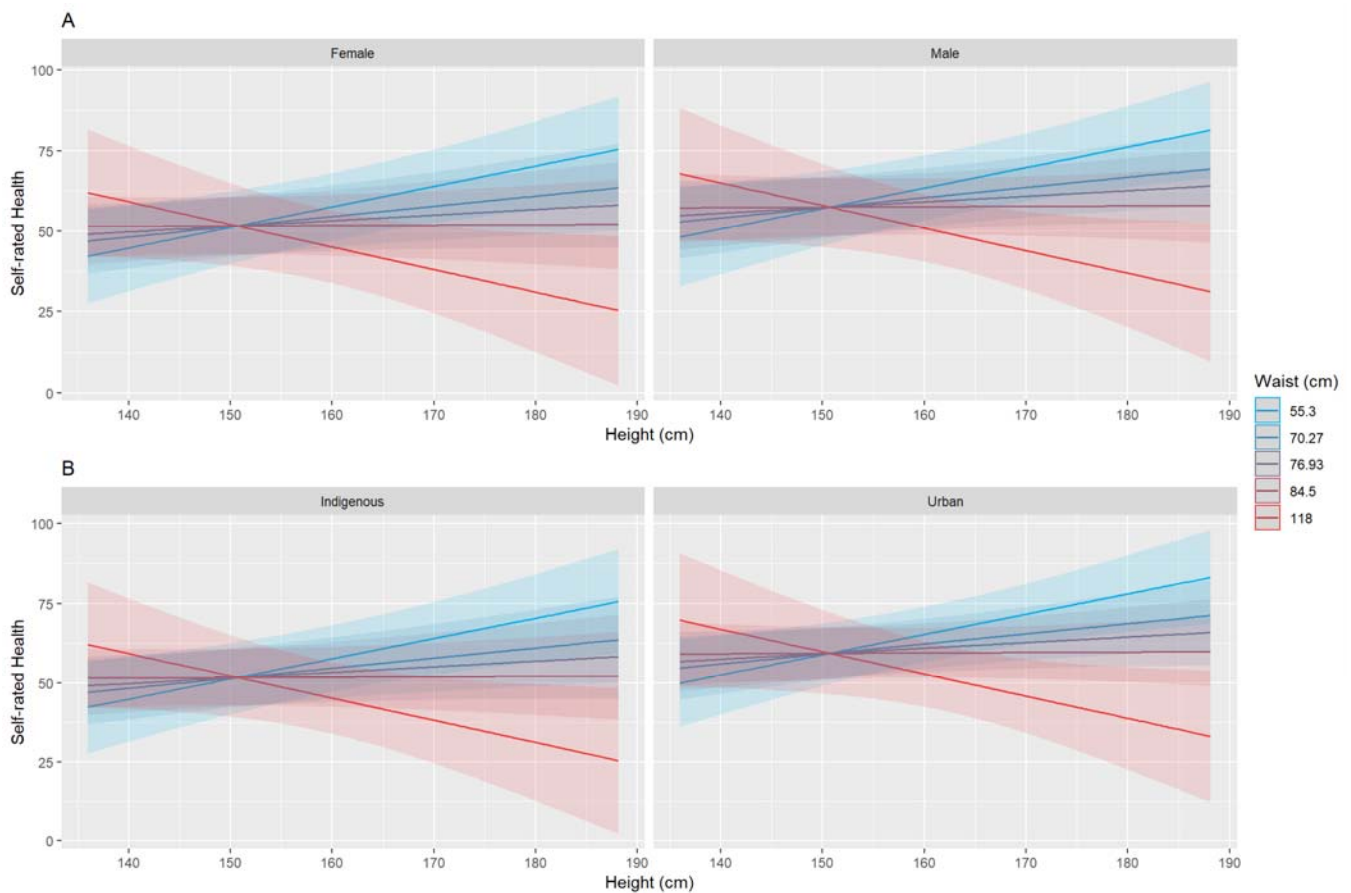

367  
368 **Figure 3. Interaction between height and waist.** Model predictions were split by (A) sex, and (B) population. To simplify  
369 the interpretation, raw (instead of centred and rescaled) values of height and waist were used. Waist reference, minimum,  
370 quartiles (lower, median and upper) and maximum waist circumference values were used, shown on a blue to red colour  
371 scale. For an interactive 3D and animated plot of the interaction between height and waist, see Fig. S4 in the Supplementary  
372 Material.

## 373 **Discussion**

374           The present study provides new insights into the relationship between height and health in men  
375 and women by studying three Latin-American populations, which included urban and indigenous  
376 populations with marked differences in access to basic needs and services like food and health.

377           Contrary to our initial hypothesis, height was not a significant predictor of self-perceived health  
378 but interacted with waist circumference in all populations studied. Most results in favour of a direct  
379 relationship between height itself and health were carried out in small modern populations and specific  
380 Western ethnic groups more than twenty years ago. New studies with non-traditional population groups  
381 have failed to verify the positive relationship between height and health, especially associated with  
382 cardiovascular and autoimmune diseases [67,68]. For example, studies on Native Americans, Japanese,  
383 Indians and Pakistanis showed that shorter people had a lower prevalence of cardiovascular disease than  
384 the tallest people in each population [68]. These findings were similar in Sardinian inhabitants, a  
385 European population with the lowest physical stature recorded in Europe in recent years [67].

386           Interestingly, our results suggest that although there is a main effect of waist circumference on  
387 self-perceived health, the associated costs of large abdominal circumference are differential depending  
388 on stature; this is, waist circumference predicted self-reported health differently for people of different  
389 heights: while being taller predicts better self-rated health for taller people with relatively small waists,  
390 being taller was found to be associated with poorer perceptions of their health in people with larger  
391 waist circumferences. Furthermore, while there is a cost of abdominal and visceral adiposity for tall  
392 people, there is no predicted cost for shorter persons. Therefore, these results argue the importance of  
393 considering a phenotypic integration of different human features that could be involved in health or

394 physiological conditions, when a possible sexually selected trait is being evaluated as a signal of  
395 immunocompetence.

396         On the other hand, given that height is the most sensible human anatomical feature to  
397 environmental and socioeconomic conditions [22,34], we expected stronger association between health  
398 and height for the indigenous population where the cost to produce and maintain this costly trait is  
399 greater than for inhabitants from urbanised areas. Nevertheless, we did not find inter-population  
400 differences in the magnitude of this relation. Urban populations reported better health than the  
401 indigenous population, and the shortest participants tended to be from the indigenous Me'Phaa sample.  
402 These results could, in fact, suggest different life-history strategies. Compared with modern Western  
403 societies, different life strategies could take place in harsh environments,[69], for instance, investing  
404 relatively less energy in growth and reallocating it towards reproduction [22]. In addition, a relative  
405 increase in the intensity or number of infectious diseases (including paediatric diseases in Me'Phaa) and  
406 higher tendency to early sexual maturity could negatively impact growth, resulting in a lower average  
407 height [70,71]. These trends could be compensations between life-history components [27]. Finally, fast  
408 and prolonged growth imply high costs for the organism [1]. Rapid growth may influence mortality risk  
409 [72] and growing for a longer time delays the onset of reproduction, increasing the risk of death and  
410 producing fewer offspring [1]. This perspective of life strategies allows us to understand the relationship  
411 between height, health and reproduction. This suggests the importance of addressing factors such as  
412 ethnicity, socioeconomic status, level of urbanisation in populations where there is great heterogeneity  
413 in access to food, health and pressure resources for pathogens, for instance, in Latin-American  
414 populations in which this relationship has barely been directly explored.

415         Although our study did not directly evaluate any immunological marker but a self-perception of  
416 health, the implementation of a physiological immune indicator of the adaptive immune system appears

417 to be consistent with our results. It has been found that men, but not women, show a curvilinear  
418 relationship between antibody response to a hepatitis-B vaccine and body height, with a positive  
419 relationship up to a height of 185 cm, but an inverse relationship in taller men [20]. In our three  
420 populations, the maximum height was lower than 185 cm, which could explain the linear but not  
421 curvilinear association that we found. In addition, the fact that self-perception in our study and antibody  
422 response in previous studies are both positively associated with body height could contribute to the  
423 knowledge about the reliability of self-perception of health as an indicator of an immunological  
424 condition.

425 Finally, in relation with sex differences, women reported lower average health than men in all  
426 communities, which is concordant with reports and normative SF-36 data in other populations,  
427 especially in younger people [73,74]. These results could consolidate the idea that height is a reliable  
428 signal of health in men [27], while it could reflect reproductive success in women [75] in terms of labour  
429 and birth, and to a lesser extent, function as an indicator of health [76]. It has been seen that taller  
430 women experience fewer problems during the labour process due to a lower risk of mismatch between  
431 foetal head size and size of the birth canal [76]. Nevertheless, this speculative idea warrants further  
432 studies on comparing health, reproductive success and female height.

433 It is important to take into account that the mode of survey administration might be a limitation  
434 in our study, and it could have led to confounding effects. For example, it is possible that indigenous  
435 people have different understanding and thresholds about their general health perception, which we were  
436 unable to evaluate without previous validation of translated items, and it could have explained the lowest  
437 values of general health reported by indigenous people. Nevertheless, it could also reflect the real health  
438 conditions in Me'Phaa communities and not a misunderstanding of the survey. Other national indicators  
439 of health, such as morbidity and mortality by gastrointestinal and nasopharyngeal infectious diseases,

440 have reported that Me'Phaa communities also present the lowest values in Mexico [48], which is  
441 consistent with our results. In fact, items for the dimension of general health perception have the lowest  
442 standard deviation and coefficient of variation in the entire SF-36 survey, in both validated Spanish  
443 [52,55] and English versions [77], which makes this dimension the most understandable one.

444 In addition, in order to consider obvious differences in language and perception of health,  
445 statistical models in this study assumed these inter-population variations *a priori*. Random effects for  
446 countries were considered in all performed LMM. We found that although urban populations differ  
447 considerably from the indigenous population, the relations between height, waist circumference and self-  
448 perceptions of health were observed in the same direction for all populations.

449 The present study contributes information which could be important in the framework of human  
450 sexual selection. If health and genetic quality cues play an important role in human mate-choice [e.g.  
451 78], and height and waist interact to signal health, its evolutionary consequences, including cognitive  
452 and behavioural effects, should be addressed in future research. This could be done by studying the  
453 interaction between waist circumference and height, in relation to reproductive and/or mating success, as  
454 well as mate preferences and perceived attractiveness, in populations with both Westernised and non-  
455 Westernised lifestyles.

## 456 **Data accessibility**

457 All data used for this article are openly available at the OSF [79]. Code to perform all analyses,  
458 data manipulation, tables and figures is available in both HTML ('Supplementary\_Material.html') and *R*  
459 *Markdown* ('Supplementary\_Material.Rmd') formats, so that it can be fully reproduced and explored in  
460 depth [80].

## 461 **Ethics**

462 All procedures for testing and recruitment were approved by Universidad El Bosque Institutional  
463 Committee on Research Ethics (PCI.2017-9444) and National Autonomous University of Mexico  
464 Committee on Research Ethics (FPSI/CE/01/2016). All participants read and signed a written informed  
465 consent.

## 466 **Funding**

467 This project was funded in Colombia by Colciencias [grant number C145I004800000881-1 to  
468 JDL] and Universidad El Bosque, Vice-rectory of Research [grant number PCI.2017-9444]. Logistics  
469 and data collection in Mexico were supported by UNAM-PAPIIT [grant numbers IA209416, IA207019]  
470 and CONACYT Ciencia Básica [grant number 241744].

## 471 **Competing interests**

472 The authors declare that they have no competing interests.

## 473 **Authors' contributions**

474 JDL, ORS, MV-A, EV and I.G-S. conceived and designed this study. JDL, ORS, AC-C, LM-S,  
475 and IG-S collected data. JDL and IG-S analysed all data. JDL, ORS, MV-A and IG-S wrote the first  
476 draft. All authors contributed to writing, approved the final version of the manuscript and gave approval  
477 for publication.

## 478 **Acknowledgments**



479 We are grateful to Laura Rojas, Angie Ramos, Ángela Valderrama, Valentina West. Sergio  
480 Camelo, Laura Quintero, Paula Garzón, María Aguirre, Andrea Pastrana, Nicola Caro, Irene Olivella.  
481 Luisa Ramírez, Laura Guarín, y Henry Segura for their help in data collection in Colom, and all our  
482 participants. We also grateful to Xuajin Me’Phaa, Margarita Mucino, Julio Gatica, and Diego  
483 Hernandez-Mucino for their help in the liaison with the Me’Phaa community, and for their help in data  
484 collection logistics.

## 485 **References**

- 486 1. Sear R. 2010 Height and reproductive success: is bigger always better? In *Homo Novus: A Human*  
487 *Without Illusions* (eds UJ Frey, C Störmer, KP Willführ), pp. 0–103. Berlin, Heidelberg: Springer  
488 Berlin Heidelberg. (doi:10.1007/978-3-642-12142-5)
- 489 2. Pawlowski B, Dunbar RIM, Lipowicz A. 2000 Tall men have more reproductive success. *Nature*  
490 **403**, 156. (doi:10.1038/35003107)
- 491 3. Stulp G, Buunk AP, Pollet T V., Nettle D, Verhulst S. 2013 Are Human Mating Preferences with  
492 Respect to Height Reflected in Actual Pairings? *PLoS One* **8**, e54186.  
493 (doi:10.1371/journal.pone.0054186)
- 494 4. Salska I, Frederick DA, Pawlowski B, Reilly AH, Laird KT, Rudd NA. 2008 Conditional mate  
495 preferences: Factors influencing preferences for height. *Pers. Individ. Dif.* **44**, 203–215.  
496 (doi:10.1016/j.paid.2007.08.008)
- 497 5. Sear R, Allal N, Mace R. 2004 Height, marriage and reproductive success in Gambian women.  
498 *Res. Econ. Anthropol.* **23**, 203–224. (doi:10.1007/s12110-006-1003-1)
- 499 6. Silventoinen K, Lahelma E, Rahkonen O. 1999 Social background, adult body-height and health.  
500 *Int. J. Epidemiol.* **28**, 911–918. (doi:10.1093/ije/28.5.911)

- 501 7. Manning JT. 1995 Fluctuating asymmetry and body weight in men and women: Implications for  
502 sexual selection. *Ethol. Sociobiol.* **16**, 145–153. (doi:10.1016/0162-3095(94)00074-H)
- 503 8. Pawlowski B, Jasienska G. 2005 Women’s preferences for sexual dimorphism in height depend  
504 on menstrual cycle phase and expected duration of relationship. *Biol. Psychol.* **70**, 38–43.  
505 (doi:10.1016/j.biopsycho.2005.02.002)
- 506 9. Melamed T. 1992 Personality correlates of physical height. *Pers. Individ. Dif.* **13**, 1349–1350.  
507 (doi:10.1016/0191-8869(92)90179-S)
- 508 10. Blaker NM, Rompa I, Dessing IH, Vriend AF, Herschberg C, van Vugt M. 2013 The height  
509 leadership advantage in men and women: Testing evolutionary psychology predictions about the  
510 perceptions of tall leaders. *Gr. Process. Intergr. Relations* **16**, 17–27.  
511 (doi:10.1177/1368430212437211)
- 512 11. Peck MN, Lundberg O. 1995 Short stature as an effect of economic and social conditions in  
513 childhood. *Soc. Sci. Med.* **41**, 733–738. (doi:10.1016/0277-9536(94)00379-8)
- 514 12. Mueller U, Mazur A. 2001 Evidence of unconstrained directional selection for male tallness.  
515 *Behav. Ecol. Sociobiol.* **50**, 302–311. (doi:10.1007/s002650100370)
- 516 13. Nettle D. 2002 Height and reproductive success in a cohort of british men. *Hum. Nat.* **13**, 473–  
517 491. (doi:10.1007/s12110-002-1004-7)
- 518 14. Nettle D. 2002 Women’s height, reproductive success and the evolution of sexual dimorphism in  
519 modern humans. *Proc. R. Soc. B Biol. Sci.* **269**, 1919–1923. (doi:10.1098/rspb.2002.2111)
- 520 15. Pawlowski B. 2003 Variable preferences for sexual dimorphism in height as a strategy for  
521 increasing the pool of potential partners in humans. *Proc. R. Soc. B Biol. Sci.* **270**, 709–712.  
522 (doi:10.1098/rspb.2002.2294)
- 523 16. Re DE, Perrett DI. 2012 Concordant preferences for actual height and facial cues to height. *Pers.*

- 524 *Individ. Dif.* **53**, 901–906. (doi:10.1016/j.paid.2012.07.001)
- 525 17. Stearns SC. 2000 Life history evolution: successes, limitations, and prospects.  
526 *Naturwissenschaften* **87**, 476–486. (doi:10.1007/s001140050763)
- 527 18. Folstad I, Karter AJ. 1992 Parasites, bright males, and the immunocompetence handicap. *Am.*  
528 *Nat.* **139**, 603–622. (doi:10.1086/285346)
- 529 19. Sheldon BC, Verhulst S. 1996 Ecological immunology: Costly parasite defences and trade-offs in  
530 evolutionary ecology. *Trends Ecol. Evol.* **11**, 317–321. (doi:10.1016/0169-5347(96)10039-2)
- 531 20. Krams IA, Skrinda I, Kecko S, Moore FR, Krama T, Kaasik A, Meija L, Lietuvielis V, Rantala  
532 MJ. 2014 Body height affects the strength of immune response in young men, but not young  
533 women. *Sci. Rep.* **4**, 1–3. (doi:10.1038/srep06223)
- 534 21. Wells J. 2003 The Thrifty Phenotype Hypothesis: Thrifty Offspring or Thrifty Mother? *J. Theor.*  
535 *Biol.* **221**, 143–161. (doi:10.1006/jtbi.2003.3183)
- 536 22. Walker R *et al.* 2006 Growth rates and life histories in twenty-two small-scale societies. *Am. J.*  
537 *Hum. Biol.* **18**, 295–311. (doi:10.1002/ajhb.20510)
- 538 23. Samaras TT. 2012 How height is related to our health and longevity: A review. *Nutr. Health* **21**,  
539 247–261. (doi:10.1177/0260106013510996)
- 540 24. Samaras TT, Elrick H. 2002 Height, body size, and longevity: is smaller better for the human  
541 body? *West. J. Med.* **176**, 206–8.
- 542 25. Hayflick L, Moorhead PS. 1961 The serial cultivation of human diploid cell strains. *Exp. Cell*  
543 *Res.* **25**, 585–621. (doi:10.1016/0014-4827(61)90192-6)
- 544 26. Giovannelli L, Saieva C, Masala G, Salvini S, Pitozzi V, Riboli E, Dolaro P, Palli D. 2002  
545 Nutritional and lifestyle determinants of DNA oxidative damage□: a study in a Mediterranean  
546 population. *Carcinogenesis* **23**, 1483–1489.

- 547 27. Stulp G, Barrett L. 2016 Evolutionary perspectives on human height variation. *Biol. Rev.* **91**, 206–  
548 234. (doi:10.1111/brv.12165)
- 549 28. Ellison PT. 2009 *On fertile ground: A natural history of human reproduction*. Cambridge, MA:  
550 Harvard University Press.
- 551 29. Iravani M, Lagerquist M, Ohlsson C, Sävendahl L. 2017 Regulation of bone growth via ligand-  
552 specific activation of estrogen receptor alpha. *J. Endocrinol.* **232**, 403–410. (doi:10.1530/JOE-16-  
553 0263)
- 554 30. Bernin H, Lotter H. 2014 Sex bias in the outcome of human tropical infectious diseases: Influence  
555 of steroid hormones. *J. Infect. Dis.* **209**. (doi:10.1093/infdis/jit610)
- 556 31. Neyrolles O, Quintana-Murci L. 2009 Sexual Inequality in Tuberculosis. *PLoS Med.* **6**, e1000199.  
557 (doi:10.1371/journal.pmed.1000199)
- 558 32. Nhamoyebonde S, Leslie A. 2014 Biological Differences Between the Sexes and Susceptibility to  
559 Tuberculosis. *J. Infect. Dis.* **209**, S100–S106. (doi:10.1093/infdis/jiu147)
- 560 33. Henrich J, Heine SJ, Norenzayan A. 2010 The weirdest people in the world? *Behav. Brain Sci.*  
561 **33**, 61–83. (doi:10.1017/S0140525X0999152X)
- 562 34. Walker R, Hamilton MJ. 2008 Life–History Consequences of Density Dependence and the  
563 Evolution of Human Body Size. *Curr. Anthropol.* **49**, 115–122. (doi:10.1086/524763)
- 564 35. Deaton A. 2007 Height, health, and development. *Proc. Natl. Acad. Sci.* **104**, 13232–13237.  
565 (doi:10.1073/pnas.0611500104)
- 566 36. Garcia J, Quintana-Domeque C. 2007 The evolution of adult height in Europe: A brief note.  
567 *Econ. Hum. Biol.* **5**, 340–349. (doi:10.1016/j.ehb.2007.02.002)
- 568 37. Lim SS *et al.* 2016 Measuring the health-related Sustainable Development Goals in 188 countries:  
569 a baseline analysis from the Global Burden of Disease Study 2015. *Lancet* **388**, 1813–1850.

- 570 (doi:10.1016/S0140-6736(16)31467-2)
- 571 38. Silventoinen K. 2003 Determinants of variation in adult body height. *J. Biosoc. Sci.* **35**, 263–285.
- 572 (doi:10.1017/S0021932003002633)
- 573 39. Dowd JB, Zajacova A, Aiello A. 2009 Early origins of health disparities: Burden of infection,
- 574 health, and socioeconomic status in U.S. children. *Soc. Sci. Med.* **68**, 699–707.
- 575 (doi:10.1016/j.socscimed.2008.12.010)
- 576 40. Kuzawa CW, Bragg JM. 2012 Plasticity in Human Life History Strategy. *Curr. Anthropol.* **53**,
- 577 S369–S382. (doi:10.1086/667410)
- 578 41. Bentham J *et al.* 2016 A century of trends in adult human height. *Elife* **5**, e13410.
- 579 (doi:10.7554/eLife.13410)
- 580 42. Human Development Report Office. 2018 Human Development Indicators and Indices: 2018
- 581 Statistical Update.
- 582 43. Fullman N *et al.* 2018 Measuring performance on the Healthcare Access and Quality Index for
- 583 195 countries and territories and selected subnational locations: a systematic analysis from the
- 584 Global Burden of Disease Study 2016. *Lancet* **391**, 2236–2271. (doi:10.1016/S0140-
- 585 6736(18)30994-2)
- 586 44. 2018 Poverty and inequality. *Colomb. Reports*, 17 November. See
- 587 <https://data.colombiareports.com/colombia-poverty-inequality-statistics/>.
- 588 45. Hall G, Patrinos HA, editors. 2004 *Indigenous Peoples, Poverty and Human Development in*
- 589 *Latin America*. The World Bank. (doi:10.1596/978-1-4039-9938-2)
- 590 46. Montenegro RA, Stephens C. 2006 Indigenous health in Latin America and the Caribbean. *Lancet*
- 591 **367**, 1859–1869. (doi:10.1016/S0140-6736(06)68808-9)
- 592 47. Biggs B, King L, Basu S, Stuckler D. 2010 Is wealthier always healthier? The impact of national
- 29

- 593 income level, inequality, and poverty on public health in Latin America. *Soc. Sci. Med.* **71**, 266–  
594 273. (doi:10.1016/j.socscimed.2010.04.002)
- 595 48. SINAIS. 2016 Sistema Nacional de Informacion en Salud. See <http://www.sinais.salud.gob.mx>.
- 596 49. Miramontes O, DeSouza O, Hernández D, Ceccon E. 2012 Non-Lévy Mobility Patterns of  
597 Mexican Me'Phaa Peasants Searching for Fuel Wood. *Hum. Ecol.* **40**, 167–174.  
598 (doi:10.1007/s10745-012-9465-8)
- 599 50. Miramontes O, DeSouza O, Hernández D, Ceccon E. 2012 Non-Lévy Mobility Patterns of  
600 Mexican Me'Phaa Peasants Searching for Fuel Wood. *Hum. Ecol.* **40**, 167–174.  
601 (doi:10.1007/s10745-012-9465-8)
- 602 51. Hernández-Muciño D, Borda-Niño B, Santiago R, Rodríguez A, Rodríguez M, Muciño M,  
603 Ceccon E. 2018 La comunidad me'phaa construye su futuro: agroecología y restauración como  
604 herramientas de desarrollo rural sustentable. In *Experiencias de colaboración transdisciplinaria  
605 para la sustentabilidad* (eds J Merçon, B Ayala-Orozco, JA Rosell), pp. 66–79. CopIt ArXives.
- 606 52. Durán-Arenas L, Gallegos-Carrillo K, Salinas-Escudero G, Martínez-Salgado H. 2004 Towards a  
607 Mexican normative standard for measurement of the short format 36 health-related quality of life  
608 instrument. *Salud Publica Mex.* **46**, 306–15.
- 609 53. Duncan PT. 2013 The Morpho-Syntax of Indefinite Pronouns in Iiatenco Me'phaa. University of  
610 Kansas. See <http://hdl.handle.net/1808/12205>.
- 611 54. Ware JE, Sherbourne CD. 1992 The MOS 36-item short-form health survey (SF-36). I.  
612 Conceptual framework and item selection. *Med. Care* **30**, 473–83.
- 613 55. Lugo A LH, García E HI, Gómez R C. 2006 Confiabilidad del cuestionario de calidad de vida en  
614 salud SF-36 en Colombia. *Rev. Fac. Nac. Salud Publica* **24**, 37–50.
- 615 56. Czernichow S, Kengne A-P, Stamatakis E, Hamer M, Batty GD. 2011 Body mass index, waist

- 616 circumference and waist-hip ratio: which is the better discriminator of cardiovascular disease  
617 mortality risk? Evidence from an individual-participant meta-analysis of 82 864 participants from  
618 nine cohort studies. *Obes. Rev.* **12**, 680–687. (doi:10.1111/j.1467-789X.2011.00879.x)
- 619 57. Després JP, Lemieux I. 2006 Abdominal obesity and metabolic syndrome. *Nature* **444**, 881–887.  
620 (doi:10.1038/nature05488)
- 621 58. Huxley R, Mendis S, Zheleznyakov E, Reddy S, Chan J. 2010 Body mass index, waist  
622 circumference and waist:hip ratio as predictors of cardiovascular risk—a review of the literature.  
623 *Eur. J. Clin. Nutr.* **64**, 16–22. (doi:10.1038/ejcn.2009.68)
- 624 59. Knowles KM, Paiva LL, Sanchez SE, Revilla L, Lopez T, Yasuda MB, Yanez ND, Gelaye B,  
625 Williams MA. 2011 Waist Circumference, Body Mass Index, and Other Measures of Adiposity in  
626 Predicting Cardiovascular Disease Risk Factors among Peruvian Adults. *Int. J. Hypertens.* **2011**,  
627 1–10. (doi:10.4061/2011/931402)
- 628 60. Alberti KGM, Zimmet P, Shaw J. 2005 The metabolic syndrome—a new worldwide definition.  
629 *Lancet* **366**, 1059–1062. (doi:10.1016/S0140-6736(05)67402-8)
- 630 61. Expert Panel on Detection Evaluation and Treatment of High Blood Cholesterol in Adults. 2001  
631 Executive Summary of The Third Report of The National Cholesterol Education Program  
632 (NCEP) Expert Panel on Detection, Evaluation, And Treatment of High Blood Cholesterol In  
633 Adults (Adult Treatment Panel III). *JAMA* **285**, 2486–2497.
- 634 62. Barr DJ, Levy R, Scheepers C, Tily HJ. 2013 Random effects structure for confirmatory  
635 hypothesis testing: Keep it maximal. *J. Mem. Lang.* **68**, 255–278. (doi:10.1016/j.jml.2012.11.001)
- 636 63. Kuznetsova A, Brockhoff PB, Christensen RHB. 2017 lmerTest Package: Tests in Linear Mixed  
637 Effects Models. *J. Stat. Softw.* **82**, 1–26. (doi:10.18637/jss.v082.i13)
- 638 64. R Core Team. 2018 R: A language and environment for statistical computing.

- 639 65. Wagenmakers E-J, Farrell S. 2004 AIC model selection using Akaike weights. *Psychon. Bull.*  
640 *Rev.* **11**, 192–196. (doi:10.3758/BF03206482)
- 641 66. Bolker B. 2017 Package ‘bbmle’. Tools for General Maximum Likelihood Estimation.
- 642 67. Pes GM, Ganau A, Tognotti E, Errigo A, Rocchi C, Dore MP. 2018 The association of adult  
643 height with the risk of cardiovascular disease and cancer in the population of Sardinia. *PLoS One*  
644 **13**, e0190888. (doi:10.1371/journal.pone.0190888)
- 645 68. Samaras TT, Elrick H, Storms LH. 2004 Is short height really a risk factor for coronary heart  
646 disease and stroke mortality? A review. *Med. Sci. Monit.* **10**, RA63-76.
- 647 69. Perry GH, Dominy NJ. 2009 Evolution of the human pygmy phenotype. *Trends Ecol. Evol.* **24**,  
648 218–225. (doi:10.1016/j.tree.2008.11.008)
- 649 70. Harvey PH, Clutton-Brock TH. 1985 Life History Variation in Primates. *Evolution (N. Y.)* **39**,  
650 559–581. (doi:10.2307/2408653)
- 651 71. Promislow DEL, Harvey PH. 1990 Living fast and dying young: A comparative analysis of life-  
652 history variation among mammals. *J. Zool.* **220**, 417–437. (doi:10.1111/j.1469-  
653 7998.1990.tb04316.x)
- 654 72. Rollo CD. 2002 Growth negatively impacts the life span of mammals. *Evol. Dev.* **4**, 55–61.  
655 (doi:10.1046/j.1525-142x.2002.01053.x)
- 656 73. Hopman WM *et al.* 2000 Canadian normative data for the SF-36 health survey. *CMAJ* **163**, 265–  
657 71.
- 658 74. Watson EK, Firman DW, Baade PD, Ring I. 1996 Telephone administration of the SF-36 health  
659 survey: validation studies and population norms for adults in Queensland. *Aust. N. Z. J. Public*  
660 *Health* **20**, 359–363. (doi:10.1111/j.1467-842X.1996.tb01046.x)
- 661 75. Gluckman PD, Hanson MA. 2006 Evolution, development and timing of puberty. *Trends*



- 662 *Endocrinol. Metab.* **17**, 7–12. (doi:10.1016/j.tem.2005.11.006)
- 663 76. Wells JCK, DeSilva JM, Stock JT. 2012 The obstetric dilemma: An ancient game of Russian  
664 roulette, or a variable dilemma sensitive to ecology? *Am. J. Phys. Anthropol.* **149**, 40–71.  
665 (doi:10.1002/ajpa.22160)
- 666 77. Walters SJ, Brazier JE. 2003 What is the relationship between the minimally important difference  
667 and health state utility values? The case of the SF-6D. *Health Qual. Life Outcomes* **1**, 4.  
668 (doi:10.1186/1477-7525-1-4)
- 669 78. Roberts SC, Little AC. 2008 Good genes, complementary genes and human mate preferences.  
670 *Genetica* **132**, 309–321. (doi:10.1007/s10709-007-9174-1)
- 671 79. Leongómez JD, Sánchez OR, Vásquez-Amézquita M, Valderrama E, González-Santoyo I. 2019  
672 Data from: Self-reported Health is Related to Body Height and Waist Circumference in Rural  
673 Indigenous and Urbanised Latin-American Populations. *Open Science Framework*.  
674 (doi:10.17605/OSF.IO/KGR5X)
- 675 80. Leongómez JD, Sánchez OR, Vásquez-Amézquita M, Valderrama E, González-Santoyo I. 2019  
676 Code and analyses from: Self-reported Health is Related to Body Height and Waist  
677 Circumference in Rural Indigenous and Urbanised Latin-American Populations. *Open Science*  
678 *Framework*. (doi:10.17605/OSF.IO/9WKMT)

679

680

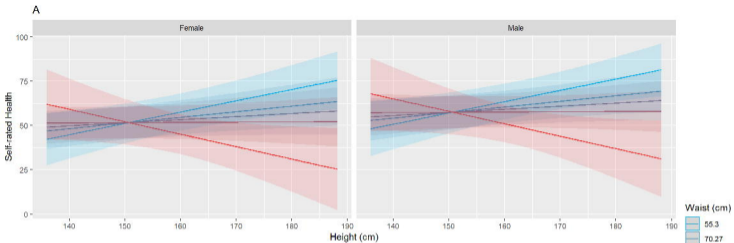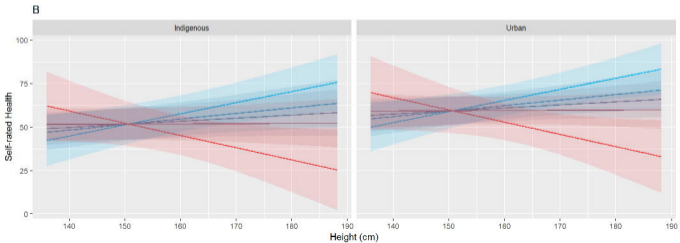

**A****Female participants**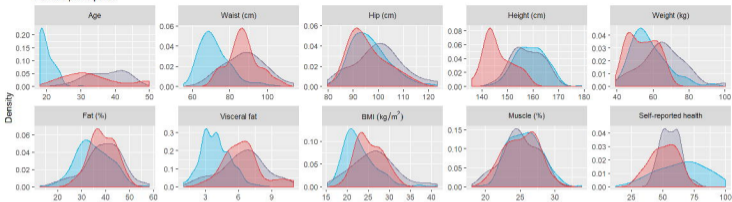**B****Male participants**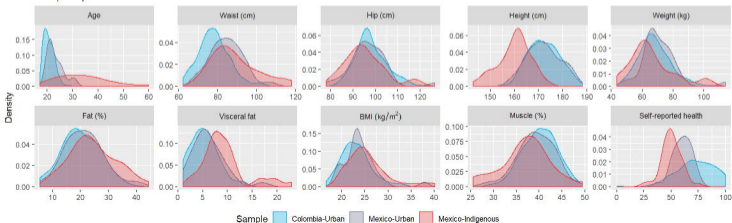

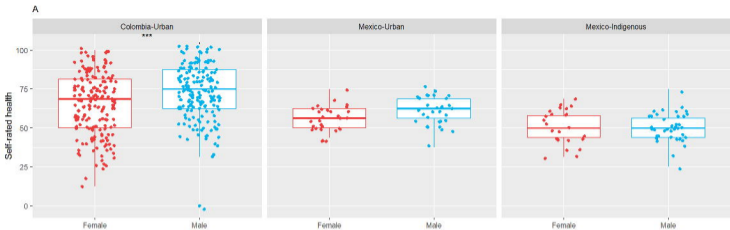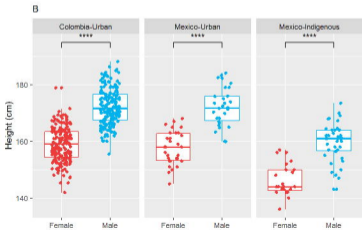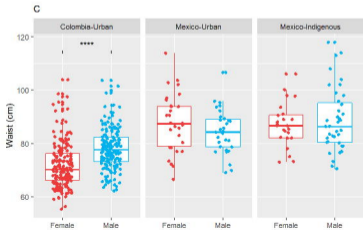

Sex ■ Female ■ Male

**A**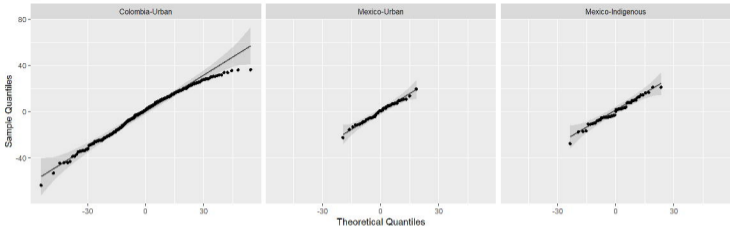**B**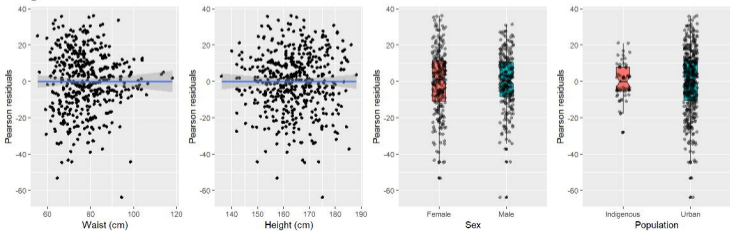

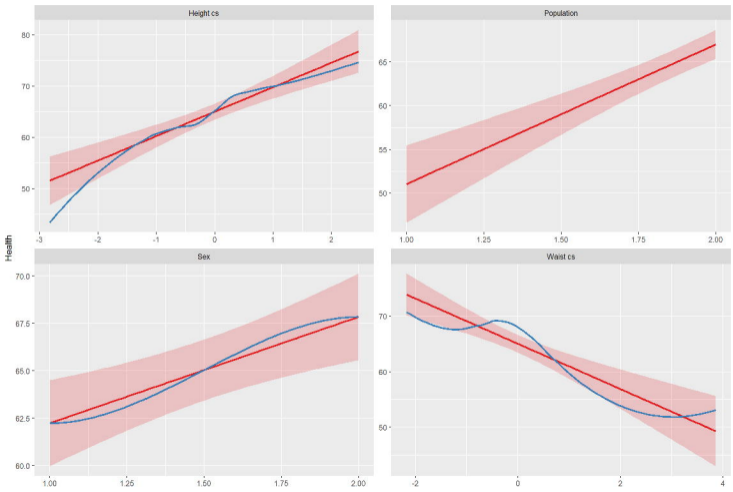

**A**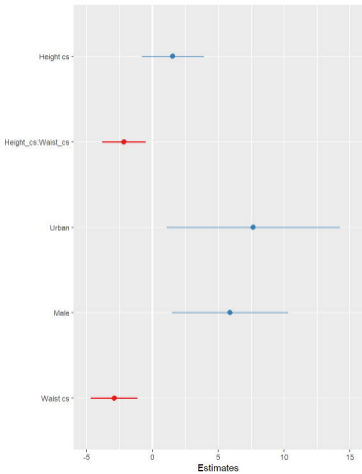**B**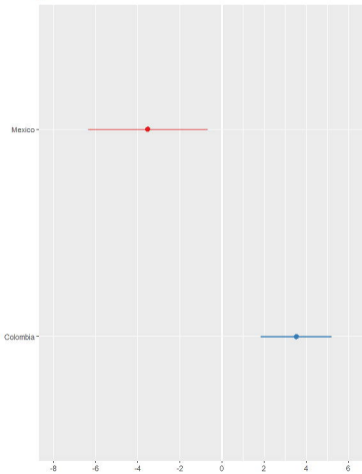

Source: http://biorxiv.org/content/10.1101/562942v4.full.pdf
